# Supplementary material for: Modulated Light Dependence of Growth, Flowering, and the Accumulation of Secondary Metabolites in Chilli
Source: Front Plant Sci. 2022 Mar 22;13:801656. doi: 10.3389/fpls.2022.801656 (PMC8981241; doi:10.3389/fpls.2022.801656)
Supplement: Supplementary file 2 [file Data_Sheet_1.xlsx]

## Sheet: Worksheet a_capsaicin
Capsaicine UPLC-US-MS/MS method details
Preparation:	Samples were prepared according to MSZ 9681-4:2002, 0.5 g dry pepper powder was extracted in 40ml methanol by ultrasonication for 3 min . Afterwards, the extraction was repeated with 10 ml of methanol. The two extracts were combined and cetrifuged at 4000 g at room temperature for 15 min. The supernatants were filtered through PTFE 0.22 µm and diluted 20 fold to 0.5 mg/ml sample ratio and injected
UPLC:	Waters Acquity I-class
Column:	Supelco Core Phenyl-Hexyl analytical column (2.7 µm; 4.6*150 mm) at 25°C
inj vol.:	1 µl	Autosampler temperature:			10 °C
Gradient conditions
A: Water		B: Acetonitrile
Time (min)	Flow rate (ml/min)	A%	B%
0	0.6	62	38
0.25	0.6	62	38
20	0.6	40	60
21	0.6	40	60
21.05	0.6	62	38
24	0.6	62	38
Detector:	Xevo TQ-XS with Unispray source
Resolution:	Unit mass (+/- 0.8 Da)
Impactor voltage:		1.5 kV
Polarity:		UniSpray Positive
Desolvation temperature:		550°C
Nebulizer gas:		6.5 bar N2
Desolvation gas flow:		1000 L/h N2
Cone gas flow:		250 L/h N2
Cone voltage:		25 V
Collision gas flow:		0.15 ml/min Argon 5.0
Collision energy:		15 eV
Component name	RT (min)	Quantitative transition		calibration (external)
		Parent m/z	Fragment m/z
nor-dihydrocapsaicin	10.84	294.2	137	Calibrated to nonivamide
nonivamide	11.34	294.2	137	External standard
trans-capsaicine	11.5	306.2	137	External standard
dihydrocapsaicine	13.51	308.2	137	External standard
Iso-dihydrocapsaicine	14.06	308.2	137	Calibrated to Dihydrocapsaicin
homocapsaicine	14.14	320.2	137	In mixture, as impurity. The area% of impurity determined and impurity used as external standard
homodihydrocapsaicin	16.3	322.2	137

## Sheet: Worksheet_b_Targeted_phenolics
Targeted phenolics UPLC-US-MS/MS method details - According to Vrhovsek et al 2012. and Pál et al. 2019, with modifications:
Preparation:	Homogenized pepper samples (0.5 g fresh weight) were weighted into 15 ml centrifuges tubes and immediately spiked with 50 ng [2H6](+)-cis,trans-abscisic acid (OlChemIm s.r.o. Olomouc, Czech Republic) serving as internal standard. Samples were extracted two times with 2.5 ml methanol:water (2:1 v/v%) solution by vigorous vortex mixing and shaking in a MiniG 1600 instrument (SPEX SamplePrep.; Metuc…
UPLC:	Waters Acquity I-class
Column:	Waters HSS T3 column (1.8 μm, 100 mm × 2.1 mm) at 40°C
inj vol.:	2 µl	Autosampler temperature:			10 °C
Gradient conditions
A: Water (0.1 v/v% formic acid) B: Acetonitrile (0.1 v/v% formic acid)
Time (min)	Flow rate (ml/min)	A%	B%
0	0.4	95	5
3	0.4	80	20
4.3	0.4	80	20
9	0.4	55	45
11	0.4	0	100
13	0.4	0	100
13.01	0.4	95	5
15	0.4	95	5
Detector 1:	PDA - 210-700 nm; 20 scans/sec
Detector 2:	Xevo TQ-XS with Unispray source
Resolution:	Unit mass (+/- 0.8 Da)
Impactor voltage:		2 kV
Polarity:		UniSpray Positive
Desolvation temperature:		550°C
Nebulizer gas:		6.5 bar N2
Desolvation gas flow:		1000 L/h N2
Cone gas flow:		450 L/h N2
Collision gas flow:		0.15 ml/min Argon 5.0
Component name	Unispray Impactor voltage polarity	quant. MS/MS transition	Pred.RT (min)	RT found (min)	Cone voltage (V)	Collision ennergy (eV)	Calibrated to
[2H6](+)-cis,trans-abscisic acid Internal standard	negative	269.1 > 159.1	7.13	7.13	20	10	external
Aesculetin	positive	179 > 133	3.49	3.52	34	22	rutin pos
ferulic acid	positive	195 > 145	4.54	4.53	12	16	external
luteolin-8-C-glucoside	positive	449 > 329	3.88	3.86	36	30	rutin pos
quercetin-3-O-rhamnoside	positive	449 > 303	5.61	5.59	16	10	rutin pos
kaempferol-3-O-glucoside	positive	449 > 287	5.51	5.5	16	14	rutin pos
quercetin-3-O-glucoside	positive	465 > 303	4.56	4.53	18	12	rutin pos
isorhamnetin-3-O-glucoside	positive	479 > 317	5.78	5.74	16	14	rutin pos
apiin	positive	565 > 271	5.45	5.52	26	30	rutin pos
rutin (quercetin-Glc-Rha)	positive	611 > 303	4.22	4.23	18	22	external
rutin neg (quercetin-Glc-Rha)	negative	609.1 > 300.1	4.22	4.22	90	38	external
isorhamnetin-3-rutinoside	positive	625 > 317	5.42	5.38	18	20	rutin pos
quercetin-3,4'-diglucoside	positive	627 > 303	3.62	3.61	18	32	rutin pos
sinapic acid	negative	223 > 208	4.67	4.71	14	10	rutin neg
abscisic acid	negative	263.1 > 153	7.18	7.16	20	10	external
naringenin	negative	271 > 150.9	8.23	8.17	46	18	external
phaseic acid	negative	279.12 > 139	5.24	5.18	25	12	external
dihydro-phaseic acid	negative	281.14 > 237.2	3.56	3.52	25	12	external
cryptochlorogenic acid	negative	353 > 173	2.93	2.88	34	14	external
chlorogenic acid	negative	353 > 191.1	2.84	2.79	36	22	external
phloridzin	negative	435 > 273	6.21	6.2	32	16	rutin neg
FOLLOWING COMPOUNDS HAVE BEEN SURVEYED BUT NOT DETECTED IN PEPPER SAMPLES
3-hydroxybenzaldehyde	positive	123 > 95	4	<LOQ	20	10	not calibrated
cinnamic acid	positive	131 > 103	7.57	<LOQ	40	12	external
anthranilic acid	positive	138 > 65	3.96	<LOQ	14	26	not calibrated
4-hydroxybenzoic acid (pHBA pos)	positive	139 > 77	2.84	<LOQ	20	18	external
4-hydroxybenzoic acid (pHBA NEG)	negative	137 > 93	2.84	<LOQ	20	12	external
2,4-dihydroxybenzoic acid	positive	153 > 109	3.29	<LOQ	24	14	not calibrated
2,5-dihydroxybenzoic acid	positive	153 > 109	2.89	<LOQ	26	16	not calibrated
2,6-dihydroxybenzoic acid	positive	153 > 109	3.59	<LOQ	26	14	not calibrated
3,4-dihydroxybenzoic acid	positive	153 > 81	2.12	<LOQ	24	20	not calibrated
3,5-dihydroxybenzoic acid	positive	153 > 109	2.11	<LOQ	26	14	not calibrated
vanillin	positive	153 > 93	4.07	<LOQ	20	16	not calibrated
4-hydroxycoumarin	positive	163 > 91	6.04	<LOQ	42	18	not calibrated
umbelliferone	positive	163 > 107	4.41	<LOQ	32	20	not calibrated
coniferyl alcohol	positive	163 > 131	4.04	<LOQ	12	10	not calibrated
p-coumaric acid	positive	165 > 91	4.04	<LOQ	16	24	external
p-coumaric acid neg	negative	163 > 93	4.04	<LOQ	20	26	external
m-coumaric acid	positive	165 > 147	4.76	<LOQ	18	12	external
m-coumaric acid neg	negative	163 > 93	4.76	<LOQ	20	26	external
o-coumaric acid	positive	165 > 103	5.78	<LOQ	18	16	external
o-coumaric acid neg	negative	163 > 93	5.76	<LOQ	20	26	external
acetovanillone	positive	167 > 43	4.59	<LOQ	20	12	not calibrated
gallic acid	positive	169 > 79	1.41	<LOQ	28	22	not calibrated
vanillic acid	positive	169 > 93	3.28	<LOQ	18	14	not calibrated
IAA - Indole3AA	positive	176.1 > 130.1	6.05	<LOQ	25	14	external
4-methylumbelliferone	positive	177 > 121	5.87	<LOQ	34	20	not calibrated
daphnetin	positive	179 > 123	3.24	<LOQ	36	22	not calibrated
caffeic acid	positive	181 > 145	3.25	<LOQ	16	16	external
methyl gallate	positive	183 > 124	2.94	<LOQ	32	22	not calibrated
syringaldehyde	positive	183 > 123	4.38	<LOQ	20	12	not calibrated
scopoletin	positive	193 > 133	4.53	<LOQ	34	20	external
syringic acid	positive	197 > 182	3.35	<LOQ	22	14	not calibrated
6-methoxyflavone	positive	253 > 108	10.64	<LOQ	16	38	not calibrated
daidzein	negative	255 > 199	6.95	<LOQ	30	24	not calibrated
baicalein	positive	271 > 123	8.8	<LOQ	46	32	not calibrated
galangin	positive	271 > 153	6.08	<LOQ	48	32	not calibrated
luteolin	positive	287 > 135	7.43	<LOQ	52	32	not calibrated
morin	positive	303 > 153	6.81	<LOQ	38	32	external
hesperetin	positive	303 > 153	8.52	<LOQ	32	26	not calibrated
quercetin	positive	303 > 153	7.41	<LOQ	50	34	external
quercetin NEG	negative	301 > 150.95	7.41	<LOQ	42	24	external
salicin	positive	309 > 185	2.28	<LOQ	38	16	not calibrated
rhamnetin	positive	317 > 123.01	9.54	<LOQ	48	42	not calibrated
isorhamnetin	positive	317 > 302	8.72	<LOQ	44	26	not calibrated
laricitrin	positive	333 > 318	7.5	<LOQ	44	26	not calibrated
esculin	positive	341 > 179	2.42	<LOQ	24	18	not calibrated
syringetin	positive	347 > 153	8.57	<LOQ	40	28	not calibrated
eupatorin-5-methylether	positive	359 > 329	8.9	<LOQ	12	18	not calibrated
fraxin	positive	369 > 207	3.09	<LOQ	32	20	not calibrated
sinensetin	positive	373 > 343	9.91	<LOQ	8	28	not calibrated
kaempferol-3-O-glucuronide	positive	463 > 287	5.5	<LOQ	18	16	not calibrated
quercetin-4'-O-glucoside	positive	465 > 303	5.7	<LOQ	18	12	not calibrated
quercetin-3-O-galactoside	positive	465 > 303	4.25	<LOQ	18	12	not calibrated
myricitrin	positive	465 > 319	4.3	<LOQ	14	10	not calibrated
quercetin-3-O-glucuronide	positive	479 > 303	4.51	<LOQ	20	18	not calibrated
quercetin-3-O-glucose-6'-acetate	positive	507 > 303	5.74	<LOQ	20	16	not calibrated
syringetin-3-O-glucoside + syringetin-3-O-galactoside	positive	509 > 347	5.8	<LOQ	16	14	not calibrated
kaempferol-3-O-rutinoside	positive	595 > 287	5.14	<LOQ	18	20	not calibrated
quercetin-3-Glc-Ara	positive	597 > 303	4.07	<LOQ	20	22	not calibrated
hesperidin	positive	611 > 449	5.89	<LOQ	18	10	not calibrated
robinin	positive	741 > 287	3.81	<LOQ	22	38	not calibrated
catechol	negative	109 > 81	2.88	<LOQ	36	12	not calibrated
benzoic acid	negative	121 > 77	5.51	<LOQ	22	12	external
salicylic acid neg	negative	137 > 93	5.81	<LOQ	20	12	external
coniferyl aldehyde	negative	179 > 119	5.71	<LOQ	22	14	not calibrated
sinapyl alcohol	negative	193 > 161	4.11	<LOQ	14	10	not calibrated
4-hydroxystilbene	negative	195 > 93	10.7	<LOQ	44	26	not calibrated
jasmonic acid	negative	209.12 > 58.9	8.3	<LOQ	22	12	external
trans-resveratrol	negative	227 > 185	6.59	<LOQ	38	18	external
cis-resveratrol	negative	227 > 185	7.55	<LOQ	40	22	external
picetannol	negative	243 > 159	5.01	<LOQ	40	28	not calibrated
chrysin	negative	253 > 143	10.19	<LOQ	44	30	not calibrated
pterostilbene	negative	255 > 240	10.6	<LOQ	40	18	external
apigenin	negative	269 > 117	8.31	<LOQ	42	34	not calibrated
phloretin	negative	273 > 167	8.29	<LOQ	32	18	not calibrated
kaempferol	negative	285 > 187.1	8.59	<LOQ	50	26	external
sakuranetin	negative	287 > 119	10.24	<LOQ	32	30	not calibrated
dihydro kaempferol	negative	287 > 259	6.12	<LOQ	20	14	external
eriodictyol	negative	289 > 153	7.29	<LOQ	30	24	not calibrated
epicathecin	negative	289 > 203	3.31	<LOQ	34	20	not calibrated
cathecin	negative	289 > 203	2.83	<LOQ	32	20	not calibrated
trans-coutaric acid	negative	295 > 163	2.88	<LOQ	20	12	not calibrated
ellagic acid	negative	301 > 145	4.36	<LOQ	52	34	not calibrated
taxifolin	negative	303 > 125	4.76	<LOQ	20	20	external
gallocathechin	negative	305 > 125	1.98	<LOQ	32	26	not calibrated
epigallocatechin	negative	305 > 125	2.56	<LOQ	32	22	not calibrated
caftaric acid	negative	311 > 149	2.31	<LOQ	18	10	not calibrated
Myricetin	negative	317 > 150.9	6.3	<LOQ	20	24	external
fertaric acid	negative	325 > 193	3.15	<LOQ	20	16	not calibrated
neochlorogenic acid	negative	353 > 191	2.24	<LOQ	26	18	external
rosmarinic acid	negative	359 > 161	6.11	<LOQ	30	18	not calibrated
quercetin-3-sulfate	negative	381 > 301	4.55	<LOQ	24	18	not calibrated
trans-piceid	negative	389 > 227	4.25	<LOQ	28	18	external
cis-piceid	negative	389 > 227	5.94	<LOQ	28	20	external
astringin	negative	405 > 243	3.57	<LOQ	36	20	not calibrated
isorhapontin	negative	419 > 241	4.74	<LOQ	30	36	not calibrated
trilobatin	negative	435 > 273	6.74	<LOQ	36	18	not calibrated
naringenin-7-O-glucoside	negative	435 > 273	6.23	<LOQ	16	14	not calibrated
catechin gallate	negative	441 > 289	4.36	<LOQ	34	18	not calibrated
epicatechin gallate	negative	441 > 289	4.33	<LOQ	34	18	not calibrated
luteolin-7-O-glucoside	negative	447 > 285	4.57	<LOQ	46	24	not calibrated
caffeic acid + catechin condensation product	negative	451 > 341	5.53	<LOQ	34	18	not calibrated
cis-e-viniferin	negative	453 > 347	7.97	<LOQ	48	22	external
trans-e-viniferin	negative	453 > 347	8.13	<LOQ	52	22	external
cis-gm-viniferin	negative	453 > 347	8.5	<LOQ	46	20	not calibrated
trans-gm-viniferin	negative	453 > 347	8.65	<LOQ	48	22	not calibrated
pallidol	negative	453 > 359	6.07	<LOQ	32	14	not calibrated
ampelopsin D + quadrangularin A	negative	453 > 359	6.74	<LOQ	42	18	not calibrated
gallocathechin gallate	negative	457 > 169	3.59	<LOQ	26	20	not calibrated
epigallocatechin gallate	negative	457 > 169	3.42	<LOQ	32	16	not calibrated
1,3-dicaffeoylquinic acid	negative	515 > 353	3.45	<LOQ	34	20	not calibrated
1,5-dicaffeoylquinic acid	negative	515 > 191	5.22	<LOQ	26	28	not calibrated
procyanidin A2	negative	575 > 285	4.7	<LOQ	42	30	not calibrated
procyanidin B1	negative	577 > 289	2.49	<LOQ	32	26	not calibrated
procyanidin B3	negative	577 > 289	2.72	<LOQ	34	22	not calibrated
procyanidin B2 + B4	negative	577 > 289	3.06	<LOQ	30	24	not calibrated
alpha-viniferin	negative	677 > 437	8.65	<LOQ	48	30	not calibrated
E-cis-miyabenol	negative	679 > 345	8.28	<LOQ	54	30	not calibrated
Z-miyabenol C	negative	679 > 345	8.91	<LOQ	54	36	not calibrated
isohopeaphenol	negative	905 > 359	7.61	<LOQ	48	38	not calibrated
ampelopsin H + vaticanol C-like isomer	negative	905 > 811	8.03	<LOQ	52	30	not calibrated

## Sheet: Worksheet_c_High_Resolution
Targeted phenolics UPLC-US-MS/MS method details - According to Vrhovsek et al 2012. and Pál et al. 2019, with modifications:											List of chromatographic elution order
Preparation:	Extract 0.5g fresh weight with 2x2.5 ml MeOH:Water=2:1 (v/v%), liquid-liquid partition with n-hexane, centrifuge, collect lower, MeOH:Water phase, filter, inject
UPLC:	Waters Acquity I-class
Column:	Waters HSS T3 column (1.8 μm, 100 mm × 2.1 mm) at 40°C
inj vol.:	2 µl	Autosampler temperature:			8 °C
Gradient conditions
A: Water (0.1 v/v% formic acid) B: Acetonitrile (0.1 v/v% formic acid)
Time (min)	Flow rate (ml/min)	A%	B%
0	0.4	95	5
3	0.4	80	20
4.3	0.4	80	20
9	0.4	55	45
11	0.4	0	100
13	0.4	0	100
13.01	0.4	95	5
15	0.4	95	5
Detector 1:	PDA - 220-600 nm; 20 scans/s at 2.4 nm resolution
Detector 2:	Vion IMS QTOF MS with Unispray ion source
Resolution:	>40000 (calculated for leucine enkephalin)
Capillary voltage:		0.5 kV
Polarity:		positive and negative
Source temperature:		120°C
Desolvation temperature:		550°C
Nebulizer gas:		6.5 bar N2
Cone gas voltage:		20 V
Desolvation gas flow:		1000 L/h N2
Cone gas flow:		100 L/h N2
Collision gas flow:		0.15 ml/min Ar 5.0
IMS:		OFF
MS scan:		m/z 100 – 2000
MS scan time:		0.4 s
Lock mass:		ON
MS/MS scan:		m/z 50 – 2000
MSE low collision energy:		6.0 eV
MSE high collision energy ramp:		20.0-30.0 eV
Component name	RT (min)	Elemental composition (neutral)	Detected as	Theoretical m/z	Experimental m/z	Difference, ppm	Detected as	Theoretical m/z	Experimental m/z	Difference, ppm
Feruloyl hexoside	3.135	C16H20O9	[M-H]-	355.103	355.104	0.253447	[M+Na]+	379.1	379.101	1.84648
Sinapoyl hexoside	3.195	C17H22O10	[M-H]-	385.114	385.115	1.27235	[M+Na]+	409.111	409.111	1.88213
Vicenin-2	3.221	C27H30O15	[M-H]-	593.151	593.152	0.640646	[M+H]+	595.166	595.166	1.22655
Apigenin C-pentosyl-C-hexoside	3.5	C26H28O14	[M-H]-	563.141	563.141	-0.195333	[M+H]+	565.155	565.156	1.69865
Apigenin C-pentosyl-C-hexoside	3.63	C26H28O14	[M-H]-	563.141	563.141	1.34957	[M+H]+	565.155	565.156	2.28256
Luteolin-8-C-hexoside	3.69	C21H20O11	[M-H]-	447.093	447.094	0.939401	[M+H]+	449.108	449.108	1.40278
Apigenin C-pentosyl-C-hexoside	3.823	C26H28O14	[M-H]-	563.141	563.141	-0.0355151	[M+H]+	565.155	565.156	1.45093
Luteolin O-(apiosyl)hexoside	4.38	C26H28O15	[M-H]-	579.136	579.136	0.759753	[M+H]+	581.15	581.151	1.84118
Luteolin O-(apiosylmalonyl)glucoside	5.71	C29H30O18	[M-H]-	665.136	665.136	-0.436001	[M+H]+	667.15	667.151	1.46893
Apigenin derivative	6.223	C28H30O15	[M-H]-	605.151	605.152	1.12369	-
6''-Malonylapiin	6.42	C29H30O17	[M-H]-	649.141	649.142	1.34023	[M+H]+	651.156	651.156	1.29001
Capsianoside-III	7.72	C50H84O26	[M-H]-	1099.52	1099.52	-0.127329	[M+Na]+	1123.51	1123.51	-0.489535
diglucoside of Capsianoside-IV	7.82	C44H72O23	[M-H]-	967.439	967.439	0.0103366	[M+Na]+	991.436	991.435	-0.907774
Capsianoside-V	8.5	C38H62O18	[M-H]-	805.386	805.387	1.15473	[M+H]+	829.383	829.383	0.626972
Suggested component name (if applicable)	RT (min)	Suggested elemental composition (neutral)	Detected as	Theoretical m/z	Experimental m/z	Difference, ppm	Detected as	Theoretical m/z	Experimental m/z	Difference, ppm	Reference
NI1	1.97	C15H20N2O7	[M-H]-	339.12	339.12	1.94622	[M+H]+	341.134	341.135	1.08462
NI2	3.34	C15H20N2O6	[M-H]-	323.125	323.125	1.88782	[M+H]+	325.139	325.14	1.78385
NI3	3.39	C26H32O13	[M-H]-	551.177	551.177	0.36286	[M+Na]+	575.174	575.174	-1.28657
NI4	3.55	- (only by UV tracking)
NI5	4.19	- (only by UV tracking)
NI6	5.59	C41H52N4O15	[M-H]-	839.336	839.336	0.14297	[M+H]+	841.35	841.351	0.796339	https://academic.oup.com/jxb/article/69/4/751/4110404
NI7	5.806	C41H52N4O15	[M-H]-	839.336	839.336	0.14297	[M+H]+	841.35	841.35	0.106971	https://academic.oup.com/jxb/article/69/4/751/4110404
NI8	6.028	- (only by UV tracking)
NI9	6.491	C35H42N4O10	[M-H]-	677.283	677.284	1.46172	[M+H]+	679.297	679.298	1.38378	https://academic.oup.com/jxb/article/69/4/751/4110404
NI10	6.711	C35H42N4O10	[M-H]-	677.283	677.282	-0.502006	[M+H]+	679.297	679.298	0.721334	https://academic.oup.com/jxb/article/69/4/751/4110404
NI11	7.02	C35H42N4O10	[M-H]-	677.283	677.282	-1.83085	[M+H]+	679.297	679.297	0.0736055	https://academic.oup.com/jxb/article/69/4/751/4110404
NI12	8.067	C56H94O30	[M-H]-	1245.58	1245.58	-0.337193	[M+Na]+	1269.57	1269.57	-1.23664	https://www.jstage.jst.go.jp/article/cpb/54/10/54_10_1365/_article
NI13	8.365	- (only by UV tracking)
NI14	8.403	C53H86O28	[M-H]-	1169.52	1169.52	1.12866	[M+Na]+	1193.52	1193.52	-0.0335143	https://link.springer.com/article/10.1007%2Fs10886-019-01074-4
NI15	8.692	- (only by UV tracking)
NI16	8.749	- (only by UV tracking)
NI17	8.827	- (only by UV tracking)
NI18	9.003	- (only by UV tracking)
NI19	9.312	- (only by UV tracking)
NI20	9.419	- (only by UV tracking)
					For MS and MS/MS spectra, see the Supplementary pdf file
